# Supplementary material
Source: publisher figshare collection journal article supplement (https://geolsoc.figshare.com/ndownloader/files/5424290)
Supplement: Supplementary file 1 [file 5424290]

Comment		SiO2	TiO2	Al2O3	FeO	MnO	MgO	CaO	Na2O	K2O	P2O5	Fo
		(wt%)	(wt%)	(wt%)	(wt%)	(wt%)	(wt%)	(wt%)	(wt%)	(wt%)	(wt%)	(mol%)
Kombiu
12-26b_B-4b	microlite	39.21	0.04	0.07	20.23	0.32	39.30	0.49	0.00	0.01	0.19	77.60
12-26b_B-9d	microlite	38.96	0.07	0.07	19.54	0.30	40.16	0.43	0.00	0.01	0.16	78.56
12-26b_B-2b	pheno	39.94	0.02	0.05	16.73	0.27	42.86	0.25	0.00	0.00	0.00	82.04
12-26b_B-2c	pheno	40.05	0.00	0.03	16.58	0.27	42.97	0.20	0.00	0.00	0.02	82.21
12-26b_B-7a	pheno	39.76	0.03	0.01	16.55	0.26	42.29	0.26	0.02	0.01	0.02	82.00
12-26b_B-9b	pheno	39.61	0.02	0.04	19.27	0.32	41.08	0.32	0.02	0.00	0.06	79.18
12-26b_B-9c	pheno	40.24	0.03	0.03	16.94	0.24	43.26	0.24	0.01	0.00	0.00	81.99
12-26b_B-10b	pheno	40.32	0.04	0.03	16.51	0.27	42.89	0.26	0.04	0.01	0.05	82.24
12-26b_B-11	pheno	39.95	0.00	0.01	17.35	0.28	42.36	0.21	0.00	0.00	0.00	81.32
12-26b_B-14	pheno	40.08	0.00	0.01	17.53	0.29	42.24	0.26	0.00	0.01	0.00	81.12
12-26b_B-16	pheno	39.94	0.04	0.01	17.43	0.26	42.27	0.22	0.00	0.00	0.01	81.22
12-26b_B-19	pheno	39.96	0.02	0.06	17.26	0.28	42.35	0.23	0.00	0.00	0.01	81.40
12-26b_E-clot1	pheno	39.68	0.00	0.03	17.48	0.28	43.82	0.25	0.00	0.03		81.72
12-26b_C-clot1	pheno	39.44	0.01	0.05	17.29	0.29	43.87	0.23	0.00	0.03		81.89
